# Supplementary material for: Increased DNA methylation of SLFN12 in CD4+ and CD8+ T cells from multiple sclerosis patients
Source: PubMed Central journal article supplement (PMC6209300; doi:10.1371/journal.pone.0206511), 2018-10-31

**S2 Fig. Scatter plots of the first 6 surrogate variables (SV1-SV6) from the CD4+ T cell analysis of all participants according to participant age at the time of blood draw. Pearson correlation coefficients and p-values are given. SV3 and SV4 appear to capture age the best.**

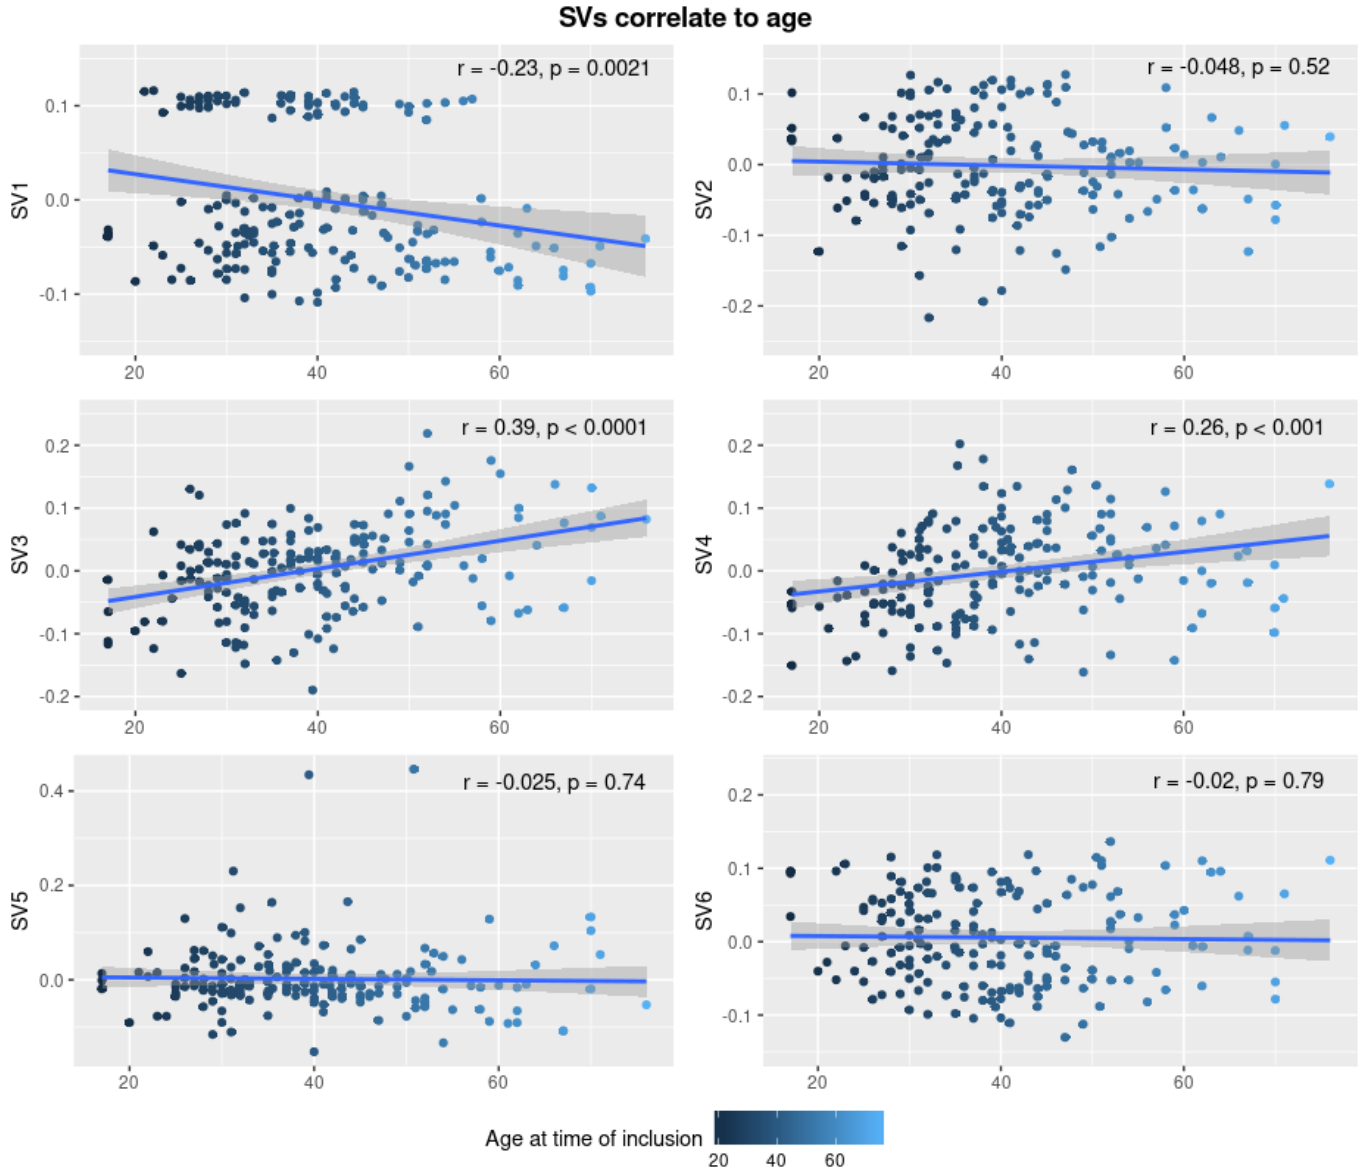

Supplement: pone.0206511.s002.pdf [file pone.0206511.s002.pdf]
